# Supplementary material for: Radical loss in the atmosphere from Cu-Fe redox coupling in aerosols
Source: Copernicus journal article supplement (doi:10.5194/acp-13-509-2013), 2013-01-16
Supplement: Supplementary file 1 [file acp-13-509-2013-supplement.pdf]

# Supplemental material

## Content

|                                                                    |    |
|--------------------------------------------------------------------|----|
| S1. Field evidence of HO <sub>2</sub> uptake and its product ..... | 1  |
| S2. Other suggested mechanisms for HO <sub>2</sub> uptake .....    | 2  |
| S3. Gas-phase diffusion limitation.....                            | 3  |
| S4. Measurements of aerosol Cu and Fe.....                         | 3  |
| S4.1 Size distribution of Cu and Fe mass in ambient aerosols ..... | 3  |
| S4.2 Measurements in PM <sub>2.5</sub> .....                       | 4  |
| S4.3 Aqueous measurements of dissolved Cu and Fe .....             | 4  |
| S5. Activity coefficient for aerosol chemistry .....               | 4  |
| Tables .....                                                       | 6  |
| Figures.....                                                       | 17 |

## S1. Field evidence of HO<sub>2</sub> uptake and its product

The importance of HO<sub>2</sub> uptake on HO<sub>x</sub> radical budget depends not only on aerosol surface area, but also on ambient HO<sub>x</sub> and NO<sub>x</sub> concentrations. Gas phase HO<sub>x</sub> loss is in general dominated by three pathways:

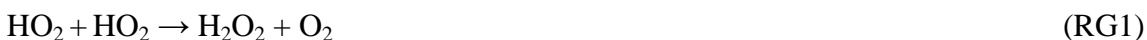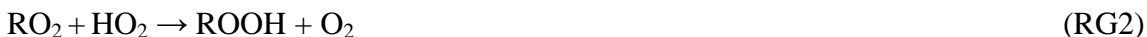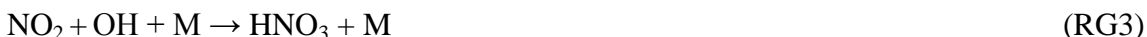

In particular, HO<sub>x</sub> loss through (RG1) and (RG2) is quadratic on HO<sub>x</sub> concentrations, while HO<sub>x</sub> loss through HO<sub>2</sub> uptake is only first-order on ambient HO<sub>x</sub>. Therefore HO<sub>x</sub> loss by HO<sub>2</sub> uptake can only be significant at relatively low level of both HO<sub>x</sub> and NO<sub>x</sub> concentrations.

We summarize previous field evidence of HO<sub>2</sub> uptake in Table S1. We find that field evidence of HO<sub>2</sub> uptake are mainly from the locations where the gas-phase photochemistry controlling HO<sub>x</sub> levels is slow (HO<sub>2</sub> is typically less than 10 ppt) or

aerosol loading is high. In fact, a recent study by Fuchs et al. (2011) found a significant interference (up to 50%) in HO<sub>2</sub> measurements by laser-induced fluorescence technique, further supporting the previously unrecognized role of HO<sub>2</sub> uptake.

Three previous studies suggest that the product from HO<sub>2</sub> uptake is unlikely to be H<sub>2</sub>O<sub>2</sub>. The first study is TOPSE aircraft campaign, in which both overestimates of total peroxy radicals (HO<sub>2</sub> + RO<sub>2</sub>) and H<sub>2</sub>O<sub>2</sub> were found when comparing box model calculations to observations (Cantrell et al., 2003; Wang et al., 2003). In particular, the overestimate of H<sub>2</sub>O<sub>2</sub> cannot be attributed to wet scavenging (Wang et al., 2003). The second study is the measurements of total peroxy radical and H<sub>2</sub>O<sub>2</sub> in dust events, in which H<sub>2</sub>O<sub>2</sub> observations can be explained by the box model with HO<sub>2</sub> uptake with no formation of H<sub>2</sub>O<sub>2</sub> and a reactive uptake for H<sub>2</sub>O<sub>2</sub> (de Reus et al., 2005). The third study is the ARCTAS aircraft campaign, in which joint atmospheric observations of HO<sub>2</sub> and H<sub>2</sub>O<sub>2</sub> suggest that HO<sub>2</sub> uptake by aerosols may not produce H<sub>2</sub>O<sub>2</sub> (Mao et al., 2010).

## S2. Other suggested mechanisms for HO<sub>2</sub> uptake

Several mechanisms have been proposed for the fate of HO<sub>2</sub> in aerosol phase. Although these mechanisms are not catalytic, they may still facilitate HO<sub>2</sub> loss in the aerosol phase.

The first mechanism is proposed by Copper and Abbatt (1996), suggesting that HO<sub>2</sub> could react with HSO<sub>4</sub><sup>-</sup>, and form the peroxymonosulfate radical SO<sub>5</sub><sup>-</sup>:

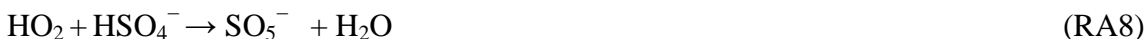

Mao et al. (2010) suggests that SO<sub>5</sub><sup>-</sup> can then react with O<sub>2</sub><sup>-</sup>, HCOO<sup>-</sup>, and HSO<sub>3</sub><sup>-</sup>, to produce the peroxide HSO<sub>5</sub><sup>-</sup> (peroxymonosulfate), followed by (RA9) and (RA10) (Jacob, 1986), leading to the conversion to water:

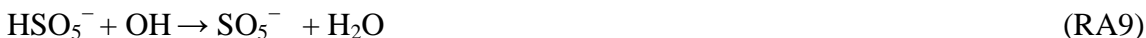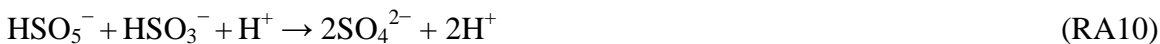

The second mechanism involves the formation of an HO<sub>2</sub> complex. Miller and Francisco (Miller and Francisco, 2001) found from quantum chemical calculations that a stable HO<sub>2</sub>-H<sub>2</sub>SO<sub>4</sub> complex can be formed in both gas and aerosol phase. But the fate of this complex is unknown.

HO<sub>2</sub> can be also consumed by reactive halogen species in the aerosol phase (Matthew et al., 2003)

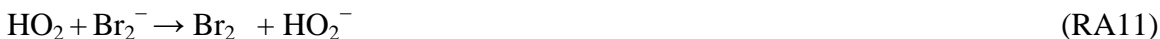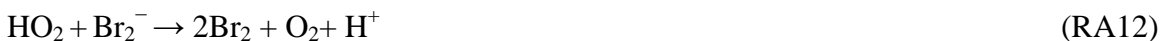

This mechanism may be efficient for sea salt aerosols.

### **S3. Gas-phase diffusion limitation**

Gas uptake by aerosols can be represented as a first-order uptake rate constant  $k$  (Jacob, 2000) :

$$k = -\left(\frac{r_e}{D_g} + \frac{4}{v\gamma}\right)^{-1} A \quad (1)$$

where  $v$  is the mean molecular speed of the gas,  $D_g$  is the gas-phase molecular diffusion coefficient,  $\gamma$  is the reactive uptake coefficient for the gas, and  $A$  is the aerosol surface area per unit volume of air.

We here address the importance of gas-phase diffusion limitation on the resulting HO<sub>2</sub> uptake rate calculated by Eq. (1). With  $\gamma(\text{HO}_2)$  closer to 1, gas-phase diffusion, the first term on the right-hand side of Eq.(1), becomes comparably important as the interfacial mass transport, i.e., the second term on the right-hand side of Eq. (1).

Figure S1 shows the ratio of interfacial mass transport to gas-phase diffusion, as a function of  $\gamma(\text{HO}_2)$  and aerosol effective radius (corrected by hygroscopic growth factor). For example, when  $\gamma(\text{HO}_2) = 1$ , gas-phase diffusion rate is equivalent to the interfacial mass transport rate at  $r_e = 0.3 \mu\text{m}$ , suggesting that gas-phase diffusion then becomes the limiting step for any aerosol with effective radius larger than  $0.3 \mu\text{m}$ . The gas-phase diffusion limitation has to be taken into account for evaluating the impact of HO<sub>2</sub> uptake on a global scale.

## **S4. Measurements of aerosol Cu and Fe**

### **S4.1 Size distribution of Cu and Fe mass in ambient aerosols**

Cu and Fe have been extensively measured in ambient aerosols. Table S2 and S3 show the measured mass fraction of aerosol Cu and Fe in ambient aerosols.

We find in Table S2 that Cu mass is mainly in submicron aerosols, indicating that combustion is indeed the major source of aerosol Cu. In fact, previous measurements in remote and urban sites both show that a large fraction of aerosol Cu is in ultrafine particles ( $<0.1 \mu\text{m}$ ) (Lannefors et al., 1983; Li and Winchester, 1993). The Cu concentrations we use here assume  $0.56 \text{ ng m}^{-3}$  in the size bin of  $0.5\text{-}1 \mu\text{m}$ , only accounting for 22% of Cu mass in submicron aerosols.

In contrast, aerosol Fe may largely originate from dust, but Table S3 still suggests a significant portion in submicron aerosols.

## S4.2 Measurements in PM2.5

We show from Table S4 the measurements of Cu and Fe in PM2.5 aerosols. Cu/Fe ratio is typically below 0.1 for aerosols in urban, rural and remote conditions. Similar results are found from the long-term measurements from IMPROVE sites over continental US (Fig S4).

## S4.3 Aqueous measurements of dissolved Cu and Fe

Table S5 shows the aqueous measurements of dissolved Cu and Fe from cloud and rain droplets. We find that dissolved Cu/Fe molar ratio is typically 0.01-0.1.

## S5. Activity coefficient for aerosol chemistry

Activity coefficient must be taken into account for calculation of aerosol chemistry. We follow Ross and Noone (1991) to calculate the activity coefficient for the ions in our simulation. For an ion(x) of charge  $z$ , the activity coefficient ( $A_x$ ) is

$$\log(A_x) = -z_x^2 D - \sum_y \varepsilon(x, y, l) m_y$$

where

$$D = \frac{0.5109\sqrt{l}}{1 + 1.5\sqrt{l}}$$

Here  $l$  is ionic strength,  $m_y$  is molality of the solution, and  $\varepsilon$  is the interaction coefficient for the correction in concentrated solutions.

$$\varepsilon(x, y, l) = \frac{(\log(A_{\mp}) + z_x z_y D)(z_x + z_y)^2}{4l}$$

The activity coefficient for free ion  $\text{Cu}^{2+}$  can be written as:

$$\log(A_{\text{Cu}^{2+}}) = -4D - \varepsilon(\text{Cu}^{2+}, \text{SO}_4^{2-})[\text{SO}_4^{2-}]$$

$\varepsilon(\text{Cu}^{2+}, \text{SO}_4^{2-})$  was calculated using the mean activity coefficients tabulated in Robinson and Stokes (2002), which varies at different ionic strength. When ionic strength is greater than 1.4m, the mean activity coefficient is adopted from Baes et al. (1993).

The activity coefficient is implemented for example as:

$$K = \frac{A(\text{CuSO}_4)[\text{CuSO}_4]}{A(\text{Cu}^{2+})[\text{Cu}^{2+}]A(\text{SO}_4^{2-})[\text{SO}_4^{2-}]}$$

Here  $K$  is the equilibrium constant for  $\text{Cu}(\text{SO}_4)(\text{aq})$  at indefinite dilution.  $A(\text{CuSO}_4)$  is the mean activity coefficient for  $\text{CuSO}_4$ .

We also correct the Henry's law constant of O<sub>2</sub>, O<sub>3</sub>, HO<sub>2</sub> and H<sub>2</sub>O<sub>2</sub>, by the activity coefficient A as a result of salting out effect (Millero and Sohn, 1992):

$$H^* = \frac{H}{A}$$

where  $H$  is the Henry's law constant at zero ionic strength.

## Tables

Table S1 Mass fraction of Cu in four size bins in ambient aerosols

|                           | Type   | <1.0<br>μm | 1.0-2.5<br>μm | 2.5-10.0<br>μm | >10.0<br>μm | Reference                             |
|---------------------------|--------|------------|---------------|----------------|-------------|---------------------------------------|
| Central England,<br>UK    | rural  | 48%        | 24%           | 24%            | 4%          | Allen et al.<br>(2001)                |
| Auchencorth, UK           | rural  | 28%        | 15%           | 45%            | 22%         | Allen et al.<br>(2001)                |
| New York City,<br>USA     | urban  | 25%        | 50%           | 15%            | 10%         | Bernstein and<br>Rahn (1979)          |
| Birmingham, UK            | urban  | 71%        | 16%           | 13%            |             | Birmili et al.<br>(2006)              |
| Suburban Vienna,<br>AT    | rural  | 58%        |               |                |             | Horvath et al.<br>(1996)              |
| Central Vienna,<br>AT     | urban  | 57%        |               |                |             | Horvath et al.<br>(1996)              |
| Ponce South, PR           | urban  | 52%        | 28%           | 16%            | 4%          | Infante and<br>Acosta (1991)          |
| Ponce West, PR            | urban  | 58%        | 11%           | 22%            | 9%          | Infante and<br>Acosta (1991)          |
| Ponce East, PR            | urban  | 26%        | 33%           | 20%            | 20%         | Infante and<br>Acosta (1991)          |
| Ponce North, PR           | urban  | 100%       |               |                |             | Infante and<br>Acosta (1991)          |
| Ponce Center, PR          | urban  | 29%        | 45%           | 17%            | 9%          | Infante and<br>Acosta (1991)          |
| Kola Peninsula,<br>Russia | remote | 46%        |               |                | 10%         | Kelley et<br>al.(1995)                |
| Thessaloniki,<br>Greece   | urban  | 46%        | 14%           | 25%            | 15%         | Samara and<br>Voutsas (2005)          |
| Southeastern US           | rural  | 99%        |               |                |             | Goforth and<br>Christoforou<br>(2006) |
| Sweden                    | rural  | 80%        | 9%            | 11%            |             | Lannefors et al.<br>(1983)            |

Table S2 Mass fraction of Fe in four size bins in ambient aerosols

|                         | Type  | <1.0<br>$\mu\text{m}$ | 1.0-2.5<br>$\mu\text{m}$ | 2.5-10.0<br>$\mu\text{m}$ | >10.0<br>$\mu\text{m}$ | Reference                             |
|-------------------------|-------|-----------------------|--------------------------|---------------------------|------------------------|---------------------------------------|
| Central England,<br>UK  | rural | 15%                   | 30%                      | 40%                       | 15%                    | Allen et al.<br>(2001)                |
| New York City,<br>USA   | urban | 21%                   | 1%                       | 46%                       | 32%                    | Bernstein and<br>Rahn (1979)          |
| Birmingham, UK          | urban | 35%                   | 32%                      | 32%                       |                        | Birmili et al.<br>(2006)              |
| Suburban Vienna,<br>AT  | rural | 50%                   |                          |                           |                        | Horvath et al.<br>(1996)              |
| Central Vienna,<br>AT   | urban | 36%                   |                          |                           |                        | Horvath et al.<br>(1996)              |
| Ponce South, PR         | urban | 28%                   | 32%                      | 15%                       | 25%                    | Infante and<br>Acosta (1991)          |
| Ponce West, PR          | urban | 29%                   | 7%                       | 23%                       | 41%                    | Infante and<br>Acosta (1991)          |
| Ponce East, PR          | urban | 20%                   | 41%                      | 21%                       | 18%                    | Infante and<br>Acosta (1991)          |
| Ponce North, PR         | urban | 42%                   | 36%                      | 0                         | 22%                    | Infante and<br>Acosta (1991)          |
| Ponce Center, PR        | urban | 28%                   | 17%                      | 21%                       | 34%                    | Infante and<br>Acosta (1991)          |
| Thessaloniki,<br>Greece | urban | 25%                   | 12%                      | 34%                       | 29%                    | Samara and<br>Voutsas (2005)          |
| Southeastern US         | rural | 22%                   |                          |                           |                        | Goforth and<br>Christoforou<br>(2006) |

Table S3 Measurements of aerosol Cu and Fe in PM2.5 (Unit: ng m<sup>-3</sup>)

|                                              | Type   | Fe               | Cu               | Cu/Fe |                          |
|----------------------------------------------|--------|------------------|------------------|-------|--------------------------|
| Background in Edinburgh                      | urban  | 27.6             | 1.4              | 5.1%  | Heal et al. (2005)       |
| Birmingham                                   | urban  | 114              | 30.2             | 26.5% | Harrison and Yin (2000)  |
| Toronto                                      | urban  | 55               | 2.5              | 4.5%  | Lee et al. (2003)        |
| Background in Switzerland                    | urban  | 200              | 11               | 5.5%  | Bukowiecki et al. (2009) |
| Mexico City <sup>a</sup>                     | urban  | 1600             | 57               | 3.6%  | Mugica et al. (2009)     |
| Background in Beijing                        | urban  | 480              | 20               | 4.2%  | Sun et al. (2006)        |
| Beijing Summer                               | urban  | 650              | 40               | 6.2%  | Sun et al. (2004)        |
| Beijing Winter                               | urban  | 1040             | 80               | 7.7%  | Sun et al. (2004)        |
| Downey, Los Angels                           | urban  | 150.9            | 3.5              | 2.3%  | Singh et al. (2002)      |
| Gosan, Korea                                 | urban  | 453 <sup>b</sup> | 4.8 <sup>b</sup> | 1.1%  | Kim et al. (2011)        |
| Diesel transport routes in Korea             | urban  | 1198             | 67.3             | 5.6%  | Kuo et al. (2009)        |
| eastern Transvaal, South Africa <sup>c</sup> | rural  | 101              | 0.62             | 0.6%  | Maenhaut et al. (1996)   |
| Fire plume in South Africa                   | rural  | 162              | 7                | 4.3%  | Formenti et al. (2003)   |
| Amazon forest dry season                     | remote | 28.2             | 1.6              | 5.7%  | Artaxo et al. (2002)     |
| Amazon forest wet season                     | remote | 21.4             | 0.33             | 1.5%  | Artaxo et al. (2002)     |
| Amazon pasture dry season                    | remote | 162              | 2.1              | 1.3%  | Artaxo et al. (2002)     |
| Amazon pasture wet season                    | remote | 26               | 0.22             | 0.8%  | Artaxo et al. (2002)     |
| Upper troposphere in Arctic                  | remote | 185              | 19               | 10.3% | Li and Winchester (1993) |
| Middle troposphere in Arctic                 | remote | 85               | 20               | 23.5% | Li and Winchester (1993) |
| Ground                                       | remote | 10               | 1                | 10.0% | Li and Winchester (1993) |

<sup>a</sup> Average over three periods.

<sup>b</sup> Only measured at PM10, averaged over seven years (2000-2006).

<sup>c</sup> Average over three sites : Skukuza, Pretoriuskop, Palmer.

<sup>d</sup> Only measured at PM10.



Table S4 Aqueous measurements of dissolved Cu and Fe

|                         | type    | dissolved Fe ( $\mu\text{M}$ ) | dissolved Cu ( $\mu\text{M}$ ) | Cu/Fe    | aqueous phase | reference                          |
|-------------------------|---------|--------------------------------|--------------------------------|----------|---------------|------------------------------------|
| Darmstadt, Germany      | urban   | 0.22                           | 0.03                           | 13.6%    | rain          | Hofmann et al. (1991)              |
| Gross-Rohrheim, Germany | rural   | 0.25                           | 0.03                           | 12%      | rain          | Hofmann et al. (1991)              |
| Plynlimon, Wales        | rural   | 0.72                           | 0.08                           | 11%      | cloud         | Wilkinson et al. (1997)            |
| Plynlimon, Wales        | rural   | 0.078                          | 0.026                          | 33%      | rain          | Wilkinson et al. (1997)            |
| Plynlimon, Wales        | rural   | 1.34                           | 0.13                           | 10%      | rain          | Cawse (1980) <sup>a</sup>          |
| Tour du Valat, France   | coastal | 0.29                           | 0.02                           | 6.9%     | rain          | Guieu et al. (1997)                |
| Jaipur, India           | urban   | 5.3                            | 0.32                           | 6.0%     | rain          | Manoj et al. (2000)                |
| Kota, India             | urban   | 4.1                            | 0.12                           | 2.9%     | rain          | Manoj et al. (2000)                |
| Paradize, New Zealand   | remote  | 0.037                          | 0.002                          | 0.5%     | rain          | Halstead et al. (2000)             |
| Bakersfield, CA         | urban   | 0.2 – 0.4                      | 0.008 – 0.015                  | 3% – 4%  | fog / stratus | Siefert et al. (1998) <sup>b</sup> |
| Great Dun Fell, UK      | rural   | 0.06 – 1.6                     | 0.0042 – 0.031                 | 2% - 20% | cloud         | Sedlak et al. (1997)               |

<sup>a</sup> Data is from Wilkinson et al. (1997).

<sup>b</sup> Dissolved TMI was measured by filter.

Table S5 Nomenclature of species in box model

| Nomenclature | Species                                                                                                  |
|--------------|----------------------------------------------------------------------------------------------------------|
| Fe(II)       | $\text{Fe}^{2+}$ , $\text{Fe}(\text{OH})^+$                                                              |
| Fe(III)      | $\text{Fe}^{3+}$ , $\text{Fe}(\text{OH})_2^+$ , $\text{Fe}(\text{SO}_4)^+$ , $\text{Fe}(\text{OH})^{2+}$ |
| Fe(IV)       | $\text{FeO}^{2+}$                                                                                        |
| Cu(I)        | $\text{Cu}^+$                                                                                            |
| Cu(II)       | $\text{Cu}^{2+}$ , $\text{CuSO}_4(\text{aq})$                                                            |

Table S6 Activity coefficients produced from AIM for  $\text{NH}_4\text{HSO}_4$  and  $(\text{NH}_4)_2\text{SO}_4$  aerosols

| Dry radii ( $\mu\text{m}$ ) | RH (%) | Wet Volume $\times 10^{-13}$ ( $\text{cm}^3$ ) | Ionic Strength | $m(\text{H}^+)^{\text{a}}$ | $m(\text{NH}_4^+)$ | $m(\text{SO}_4^{2-})$ | $m(\text{HSO}_4^-)$ | $A(\text{SO}_4^{2-})^{\text{b}}$ | $A(\text{H}^+)$ |
|-----------------------------|--------|------------------------------------------------|----------------|----------------------------|--------------------|-----------------------|---------------------|----------------------------------|-----------------|
| 0.35                        | 85     | 7.90                                           | 7.84           | 1.74                       | 4.36               | 1.74                  | 2.63                | 0.010                            | 1.020           |
| 0.35                        | 85     | 8.65                                           | 12.2           | 0.102                      | 8.43               | 3.90                  | 0.32                | 0.0162                           | 0.255           |
| 0.35                        | 85     | 8.25                                           | 13.2           | 1.14(-2) <sup>c</sup>      | 8.85               | 4.39                  | 0.0328              | 0.0159                           | 0.203           |
| 0.35                        | 85     | 8.21                                           | 13.3           | 1.16(-3)                   | 8.89               | 4.44                  | 3.29(-3)            | 0.0159                           | 0.199           |
| 0.35                        | 85     | 8.20                                           | 13.3           | 1.37(-4)                   | 8.90               | 4.45                  | 3.89(-4)            | 0.0159                           | 0.198           |
| 0.35                        | 85     | 8.20                                           | 13.3           | 1.37(-5)                   | 8.90               | 4.45                  | 3.89(-4)            | 0.0159                           | 0.198           |

<sup>a</sup> Molality with unit mol/kg solvent.

<sup>b</sup> Activity coefficient.

<sup>c</sup> Read 1.14(-2) as  $1.14 \times 10^{-2}$ .

Table S7 Activity coefficients used in the box model

|                                                                                                                     | Activity coefficient            |
|---------------------------------------------------------------------------------------------------------------------|---------------------------------|
| Univalent ions                                                                                                      |                                 |
| $\text{Cu}^+$ , $\text{Fe}(\text{OH})^+$ , $\text{Fe}(\text{OH})_2^+$ , $\text{Fe}(\text{SO}_4)^+$ , $\text{O}_2^-$ | 0.6                             |
| Bivalent ions                                                                                                       |                                 |
| $\text{Cu}^{2+}$ , $\text{Fe}^{2+}$ , $\text{Fe}(\text{OH})^{2+}$ , and $\text{FeO}^{2+}$                           | Calculated as $\text{Cu}^{2+}$  |
| Trivalent ions                                                                                                      |                                 |
| $\text{Fe}^{3+}$                                                                                                    | 0.01 <sup>a</sup>               |
| Neutral species                                                                                                     |                                 |
| $\text{HO}_2$ , $\text{OH}$ , $\text{O}_2$ , $\text{O}_3$ , $\text{H}_2\text{O}_2$ , $\text{Cl}$                    | $10^{0.1 \cdot I}$ <sup>b</sup> |

<sup>a</sup> lowest estimate from Millero et al. (2009).

<sup>b</sup>  $I$  is the ionic strength. This calculation is following Ross and Noone (1991).

Table S8 Kinetic data for the simulation of TMI chemistry in aqueous aerosols

| Reactants                                               | Products                                                      | No. | $k_{298}$ | Ea/R | Reference                       |
|---------------------------------------------------------|---------------------------------------------------------------|-----|-----------|------|---------------------------------|
| <b>Fe chemistry</b>                                     |                                                               |     |           |      |                                 |
| $\text{H}_2\text{O}_2 + \text{Fe}^{2+}$                 | $\text{Fe}^{3+} + \text{OH} + \text{OH}^-$                    | R1  | 70        | 5050 | Christensen et al. (1993)       |
| $\text{H}_2\text{O}_2 + \text{FeO}^{2+}$                | $\text{Fe}^{3+} + \text{HO}_2 + \text{OH}^-$                  | R2  | 9.5(3)    | 2800 | Jacobsen et al. (1997)          |
| $\text{H}_2\text{O}_2 + \text{Fe}(\text{OH})^+$         | $\text{Fe}(\text{OH})^{2+} + \text{OH} + \text{OH}^-$         | R3  | 1.9(6)    | 6200 | Moffett and Zika (1987)         |
| $\text{H}_2\text{O}_2 + \text{Fe}^{3+}$                 | $\text{Fe}^{2+} + \text{HO}_2 + \text{H}^+$                   | R4  | 2.0(-3)   |      | Walling and Goose (1973)        |
| $\text{H}_2\text{O}_2 + \text{Fe}(\text{OH})^{2+}$      | $\text{Fe}^{2+} + \text{HO}_2 + \text{H}_2\text{O}$           | R5  | 2.0(-3)   |      | estimated <sup>a</sup>          |
| $\text{O}_2^- + \text{Fe}^{2+} + 2\text{H}^+$           | $\text{H}_2\text{O}_2 + \text{Fe}^{3+}$                       | R7  | 1.0(7)    |      | Rush and Bielski (1985)         |
| $\text{O}_2^- + \text{Fe}^{3+}$                         | $\text{Fe}^{2+} + \text{O}_2$                                 | R8  | 1.5(8)    |      | Rush and Bielski (1985)         |
| $\text{O}_2^- + \text{Fe}(\text{OH})^{2+}$              | $\text{Fe}^{2+} + \text{O}_2 + \text{OH}^-$                   | R9  | 1.5(8)    |      | Rush and Bielski (1985)         |
| $\text{O}_2^- + \text{Fe}(\text{OH})^{2+}$              | $\text{Fe}^{2+} + \text{O}_2 + 2\text{OH}^-$                  | R10 | 1.5(8)    |      | Rush and Bielski (1985)         |
| $\text{HO}_2 + \text{Fe}^{2+} + \text{H}^+$             | $\text{Fe}^{3+} + \text{H}_2\text{O}_2$                       | R11 | 1.2(6)    | 5050 | Jayson et al. (1973a)           |
| $\text{HO}_2 + \text{FeO}^{2+}$                         | $\text{Fe}^{3+} + \text{O}_2 + \text{OH}^-$                   | R12 | 2.0(6)    |      | Jacobsen et al. (1998)          |
| $\text{HO}_2 + \text{Fe}(\text{OH})^{2+}$               | $\text{Fe}^{2+} + \text{O}_2 + \text{H}_2\text{O}$            | R13 | 1.3(5)    |      | Ziajka et al. (1994)            |
| $\text{OH} + \text{Fe}^{2+}$                            | $\text{Fe}(\text{OH})^{2+}$                                   | R14 | 4.6(8)    | 1100 | Christensen and Sehested (1981) |
| $\text{OH} + \text{FeO}^{2+} + \text{H}^+$              | $\text{Fe}^{3+} + \text{H}_2\text{O}_2$                       | R15 | 1.0(7)    |      | Loegager et al. (1992)          |
| $\text{O}_3 + \text{Fe}^{2+}$                           | $\text{FeO}^{2+} + \text{O}_2$                                | R16 | 8.2(5)    |      | Loegager et al. (1992)          |
| $\text{FeO}^{2+} + \text{H}_2\text{O}$                  | $\text{Fe}^{3+} + \text{OH} + \text{OH}^-$                    | R17 | 1.3(-2)   | 4100 | Jacobsen et al. (1998)          |
| $\text{FeO}^{2+} + \text{Fe}^{2+} + \text{H}_2\text{O}$ | $2\text{Fe}^{3+} + 2\text{OH}^-$                              | R18 | 7.2(4)    | 842  | Jacobsen et al. (1997)          |
| $\text{Cl}_2^- + \text{Fe}^{2+}$                        | $\text{Fe}^{3+} + 2\text{Cl}^-$                               | R22 | 1.0(7)    | 3060 | Thornton and Laurence (1973)    |
| $\text{O}_2^- + \text{Fe}(\text{SO}_4)^+$               | $\text{Fe}^{2+} + \text{SO}_4^{2-} + \text{O}_2$              | R33 | 1.5(8)    |      | Rush and Bielski (1985)         |
| $\text{HO}_2 + \text{Fe}(\text{SO}_4)^+$                | $\text{Fe}^{2+} + \text{SO}_4^{2-} + \text{O}_2 + \text{H}^+$ | R34 | 1.0(3)    |      | Rush and Bielski (1985)         |
| $\text{Fe}^{3+} + \text{SO}_4^{2-}$                     | $\text{Fe}(\text{SO}_4)^+$                                    | R44 | 3.2(3)    |      | Jayson et al. (1973b)           |
| $\text{Fe}(\text{SO}_4)^+$                              | $\text{Fe}^{3+} + \text{SO}_4^{2-}$                           | R45 | 2.7(1)    |      | Jayson et al. (1973b)           |

|                                                                 |                                                                     |      |          |                               |
|-----------------------------------------------------------------|---------------------------------------------------------------------|------|----------|-------------------------------|
| <b>Cu chemistry</b>                                             |                                                                     |      |          |                               |
| OH + Cu <sup>+</sup>                                            | Cu <sup>2+</sup> + OH <sup>-</sup>                                  | R48  | 3.0(9)   | Goldstein et al. (1992)       |
| O <sub>2</sub> + Cu <sup>+</sup>                                | Cu <sup>2+</sup> + O <sub>2</sub> <sup>-</sup>                      | R50  | 4.6(5)   | Bjergbakke et al. (1976)      |
| H <sub>2</sub> O <sub>2</sub> + Cu <sup>+</sup>                 | Cu <sup>2+</sup> + OH + OH <sup>-</sup>                             | R51  | 7.0(3)   | Berdnikov (1973)              |
| HO <sub>2</sub> + Cu <sup>+</sup> + H <sup>+</sup>              | Cu <sup>2+</sup> + H <sub>2</sub> O <sub>2</sub>                    | R52  | 3.5(9)   | Berdnikov (1973)              |
| O <sub>2</sub> <sup>-</sup> + Cu <sup>+</sup> + H <sup>+</sup>  | Cu <sup>2+</sup> + H <sub>2</sub> O <sub>2</sub>                    | R53  | 9.4(9)   | Piechowski et al. (1993)      |
| HO <sub>2</sub> + Cu <sup>2+</sup>                              | Cu <sup>+</sup> + O <sub>2</sub> + H <sup>+</sup>                   | R54  | 1.0(8)   | Rabani et al. (1973)          |
| O <sub>2</sub> <sup>-</sup> + Cu <sup>2+</sup>                  | Cu <sup>+</sup> + O <sub>2</sub>                                    | R55  | 8.0(9)   | Rabani et al. (1973)          |
| HO <sub>2</sub> + Cu(SO <sub>4</sub> )                          | Cu <sup>+</sup> + O <sub>2</sub> + HSO <sub>4</sub> <sup>-</sup>    | R117 | 1.0(7)   | estimated                     |
| O <sub>2</sub> <sup>-</sup> + Cu(SO <sub>4</sub> )              | Cu <sup>+</sup> + O <sub>2</sub> + SO <sub>4</sub> <sup>2-</sup>    | R118 | 1.0(8)   | estimated                     |
| <b>Cu-Fe coupling</b>                                           |                                                                     |      |          |                               |
| Fe <sup>3+</sup> + Cu <sup>+</sup>                              | Cu <sup>2+</sup> + Fe <sup>2+</sup>                                 | R87  | 1.3(7)   | Bjergbakke et al. (1976)      |
| Fe(OH) <sup>2+</sup> + Cu <sup>+</sup>                          | Cu <sup>2+</sup> + Fe <sup>2+</sup> + OH <sup>-</sup>               | R88  | 3.0(7)   | Sedlak and Hoigné (1993)      |
| Fe(OH) <sub>2</sub> <sup>+</sup> + Cu <sup>+</sup>              | Cu <sup>2+</sup> + Fe <sup>2+</sup> + 2OH <sup>-</sup>              | R89  | 1.3(7)   | estimated <sup>a</sup>        |
| Fe(SO <sub>4</sub> ) <sup>+</sup> + Cu <sup>+</sup>             | Cu <sup>2+</sup> + Fe <sup>2+</sup> + SO <sub>4</sub> <sup>2-</sup> | R116 | 1.8(6)   | estimated <sup>b</sup>        |
| <b>Odd hydrogen</b>                                             |                                                                     |      |          |                               |
| OH + HO <sub>2</sub>                                            | H <sub>2</sub> O + O <sub>2</sub>                                   | R93  | 7.0(9)   | Sehested et al. (1968)        |
| OH + O <sub>2</sub> <sup>-</sup>                                | OH <sup>-</sup> + O <sub>2</sub>                                    | R94  | 1.0(10)  | Sehested et al. (1968)        |
| OH + H <sub>2</sub> O <sub>2</sub>                              | H <sub>2</sub> O + HO <sub>2</sub>                                  | R95  | 2.7(7)   | Christensen et al. (1982)     |
| HO <sub>2</sub> + HO <sub>2</sub>                               | H <sub>2</sub> O <sub>2</sub> + O <sub>2</sub>                      | R99  | 8.6(5)   | Bielski (1978)                |
| HO <sub>2</sub> + O <sub>2</sub> <sup>-</sup>                   | H <sub>2</sub> O <sub>2</sub> + O <sub>2</sub> + OH <sup>-</sup>    | R100 | 1.0(8)   | Bielski (1978)                |
| O <sub>3</sub> + O <sub>2</sub> <sup>-</sup> + H <sub>2</sub> O | OH + 2O <sub>2</sub> + OH <sup>-</sup>                              | R101 | 1.5(9)   | Sehested et al. (1983)        |
| <b>Photolysis</b>                                               |                                                                     |      |          |                               |
| O <sub>3</sub> + H <sub>2</sub> O                               | H <sub>2</sub> O <sub>2</sub> + O <sub>2</sub>                      | P1   | 2.98(-4) | Graedel and Weschler (1981)   |
| H <sub>2</sub> O <sub>2</sub>                                   | 2OH                                                                 | P2   | 4.81(-6) | Graedel and Weschler (1981)   |
| Fe <sup>3+</sup> + H <sub>2</sub> O                             | Fe <sup>2+</sup> + OH + H <sup>+</sup>                              | P9   | 6.41(-6) | Benkelberg and Warneck (1995) |
| Fe(OH) <sup>2+</sup>                                            | Fe <sup>2+</sup> + OH                                               | P10  | 5.63(-3) | Benkelberg and                |

---

|                                       |                                          |     |           |       |                             |
|---------------------------------------|------------------------------------------|-----|-----------|-------|-----------------------------|
|                                       |                                          |     |           |       | Warneck (1995)              |
| <b>Equilibria</b>                     |                                          |     |           |       |                             |
| $\text{Fe}^{2+} + \text{H}_2\text{O}$ | $\text{Fe}(\text{OH})^+ + \text{H}^+$    | E1  | 3.22(-10) |       | Mesmer (1971)               |
| $\text{Fe}^{3+} + \text{H}_2\text{O}$ | $\text{Fe}(\text{OH})^{2+} + \text{H}^+$ | E2  | 6.0(-3)   |       | Brandt and van Eldik (1995) |
| $\text{HO}_2$                         | $\text{O}_2^- + \text{H}^+$              | E14 | 2.05(-5)  |       | Bielski (1978)              |
| $\text{H}_2\text{O}_2$                | $\text{HO}_2^- + \text{H}^+$             | E15 | 1.6(-12)  | -3700 | Hoffmann et al. (1985)      |
| $\text{Cu}^{2+} + \text{SO}_4^{2-}$   | $\text{Cu}(\text{SO}_4)$                 | E20 | 2.3(2)    |       | Casas et al. (2000)         |

---

<sup>a</sup> Estimated following Deguillaume et al. (2004)

<sup>b</sup>: use the lowest value measured in  $\text{H}_2\text{SO}_4$  solution when  $\text{pH}=1.6$ , assuming  $\text{Fe}(\text{III})$  is dominated by  $\text{Fe}(\text{SO}_4)^+$ .

Table S9 Henry's law constants for species in box model

| Species                       | $K_{298}$ (M atm <sup>-1</sup> ) | $\Delta H^\circ_{298}/R$ (K) | reference                         |
|-------------------------------|----------------------------------|------------------------------|-----------------------------------|
| HO <sub>2</sub>               | 2.0(3)                           | 6600                         | Schwartz (1984)                   |
| H <sub>2</sub> O <sub>2</sub> | 7.4(4)                           | 6615                         | Lind and Kok<br>(1986)            |
| O <sub>2</sub>                | 1.2(-3)                          | 1620                         |                                   |
| O <sub>3</sub>                | 1.1(-2)                          | 2300                         | Kosak-Channing<br>and Helz (1983) |

Note: Read 2.0 (3) as  $2.0 \times 10^{-3}$ . The Henry's Law constant  $K$  at temperature  $T$  is

$$K = K_{298} \exp\left[\frac{-\Delta H^\circ_{298}}{R} \left(\frac{1}{T} - \frac{1}{T_0}\right)\right], \text{ where } T_0 = 298 \text{ K.}$$



## Figures

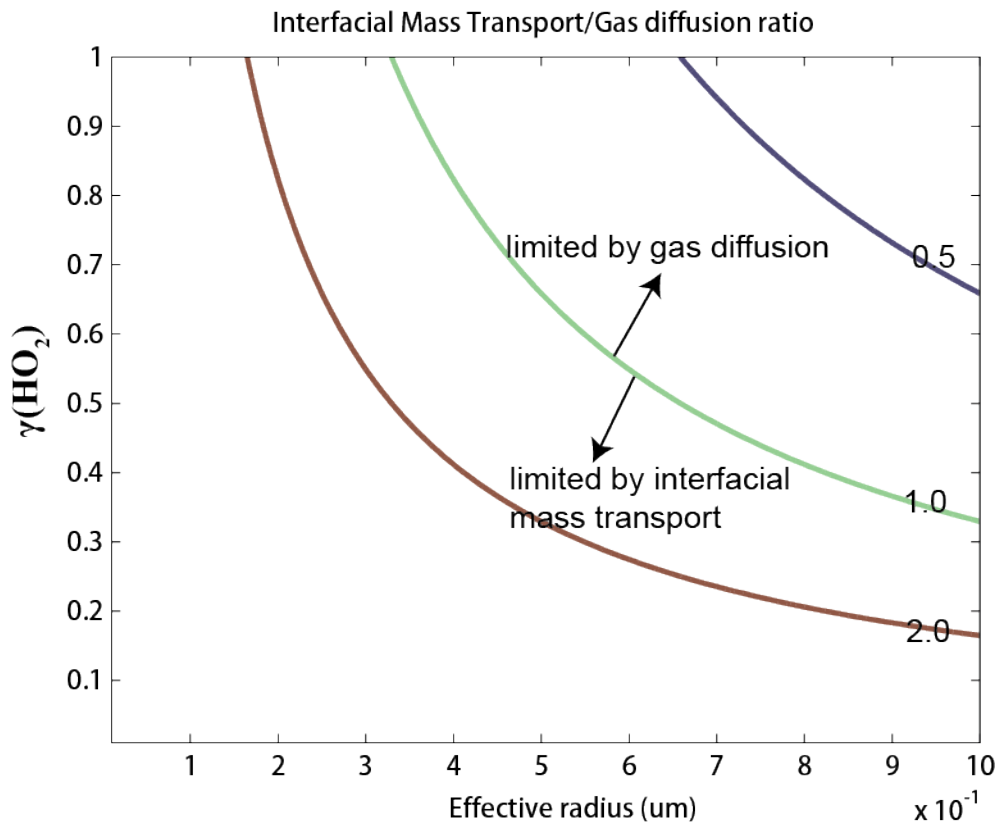

Figure S1 Ratio of interfacial mass transport to gas diffusion as a function of  $\gamma(\text{HO}_2)$  and aerosol effective radius (corrected by hygroscopic growth factor).

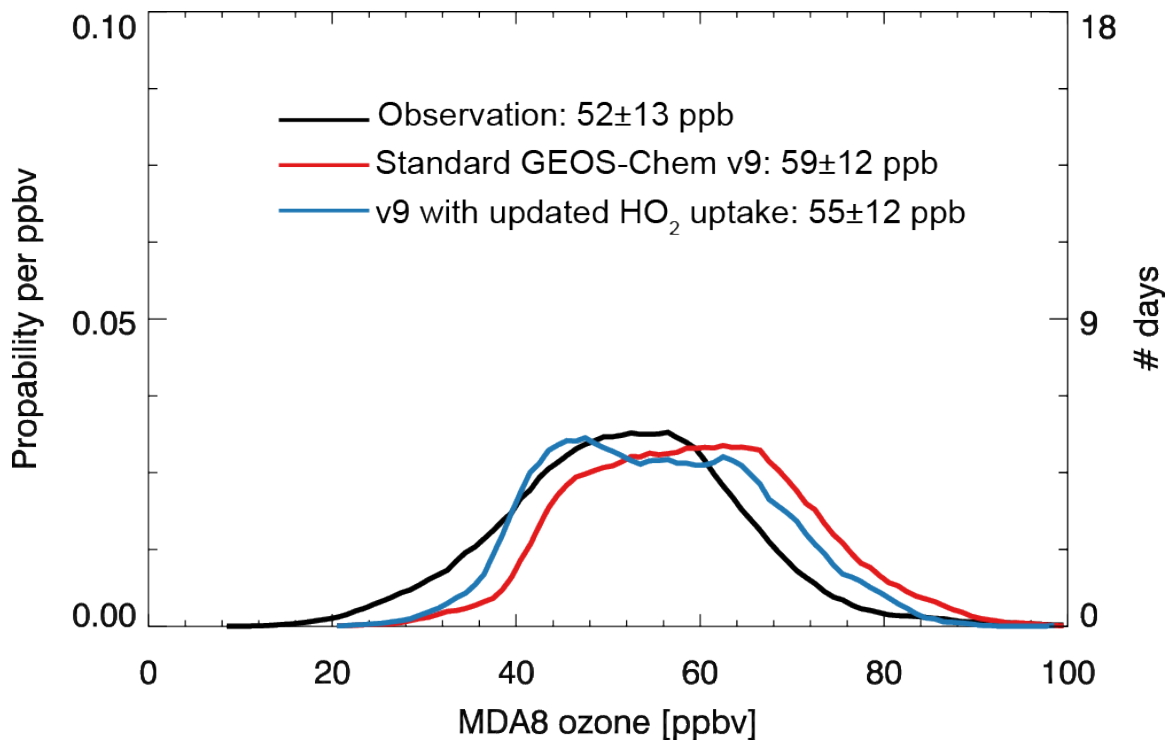

Figure S2 Probability distributions of daily 8-h max ozone concentrations in March-August 2006 for 80 CASTNet sites in the US. Observations (black) are compared to standard GEOS-Chem simulations (red) and GEOS-Chem with updated HO<sub>2</sub> uptake (blue).

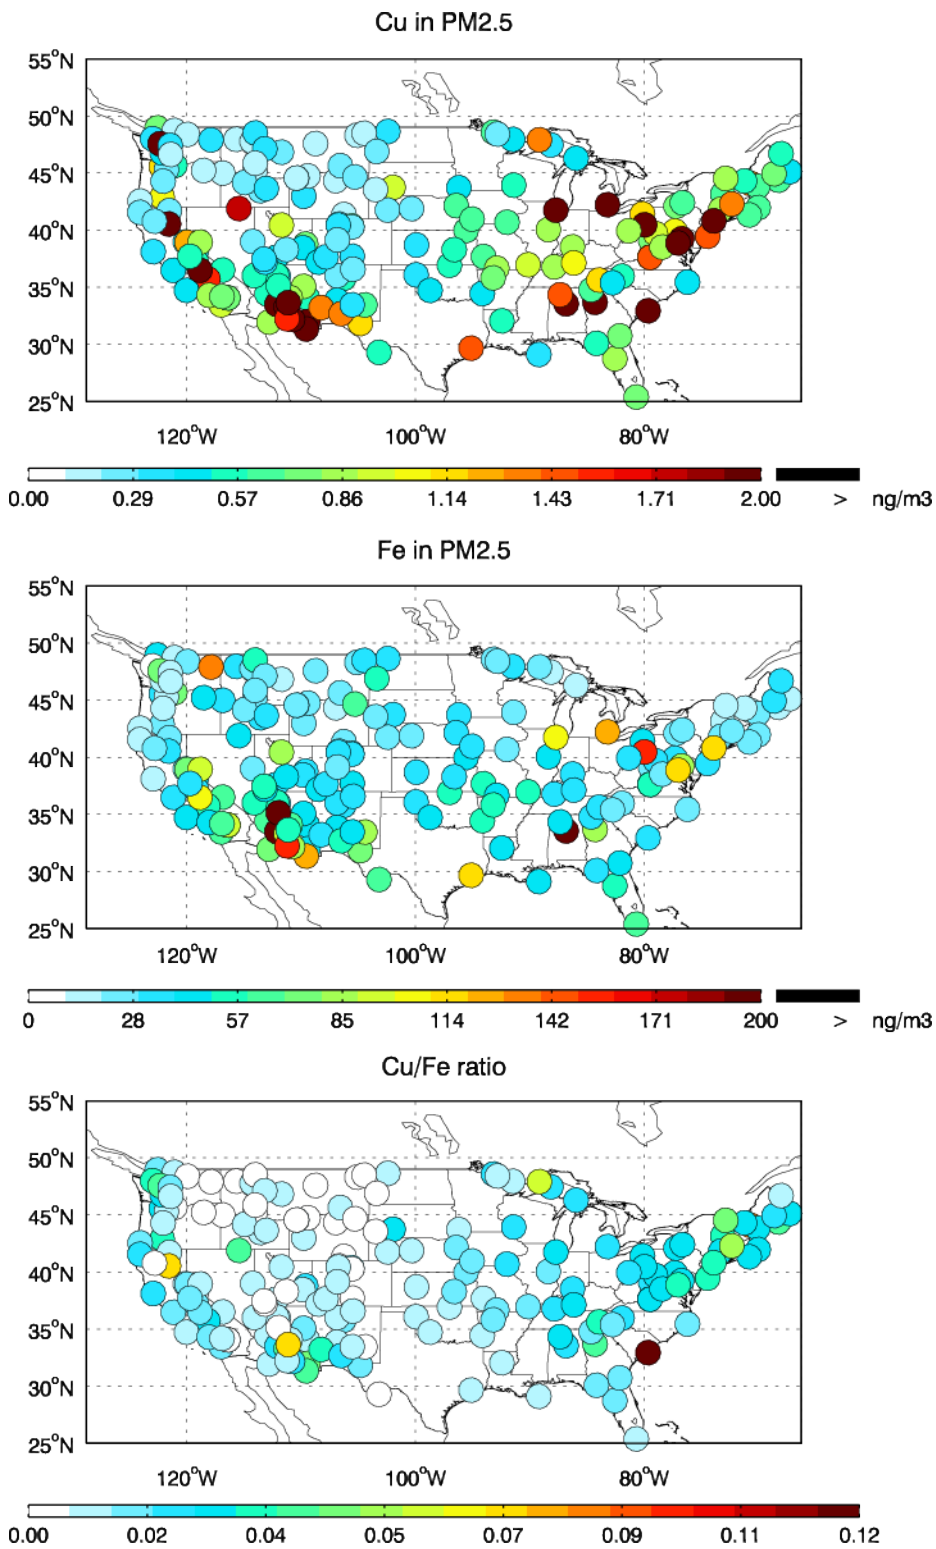

Figure S3 Mean concentrations of measured Cu and Fe in PM 2.5 from the IMPROVE sites in continental US during the period of 1988-2004.

## Reference

- Allen, A. G., Nemitz, E., Shi, J. P., Harrison, R. M., and Greenwood, J. C.: Size distributions of trace metals in atmospheric aerosols in the United Kingdom, *Atmos. Environ.*, 35, 4581-4591, 10.1016/s1352-2310(01)00190-x, 2001.
- Artaxo, P., Martins, J. V., Yamasoe, M. A., Procópio, A. S., Pauliquevis, T. M., Andreae, M. O., Guyon, P., Gatti, L. V., and Leal, A. M. C.: Physical and chemical properties of aerosols in the wet and dry seasons in Rondônia, Amazonia, *J. Geophys. Res.*, 107, 8081, 10.1029/2001jd000666, 2002.
- Baes, C. F., Reardon, E. J., and Moyer, B. A.: Ion interaction model applied to the cupric sulfate-sulfuric acid-water system at 25.degree.C, *The Journal of Physical Chemistry*, 97, 12343-12348, 10.1021/j100149a040, 1993.
- Benkelberg, H.-J., and Warneck, P.: Photodecomposition of Iron(III) Hydroxo and Sulfato Complexes in Aqueous Solution: Wavelength Dependence of OH and SO<sub>4</sub>-Quantum Yields, *The Journal of Physical Chemistry*, 99, 5214-5221, 10.1021/j100014a049, 1995.
- Berdnikov, V.: Catalytic activity of the hydrated copper ion in the decomposition of hydrogen peroxide, *Russian Journal of Physical Chemistry*, 47, 1060-1162, 1973.
- Bernstein, D. M., and Rahn, K. A.: NEW YORK SUMMER AEROSOL STUDY: TRACE ELEMENT CONCENTRATIONS AS A FUNCTION OF PARTICLE SIZE, *Annals of the New York Academy of Sciences*, 322, 87-97, 10.1111/j.1749-6632.1979.tb14119.x, 1979.
- Bielski, B. H. J.: REEVALUATION OF THE SPECTRAL AND KINETIC PROPERTIES OF HO<sub>2</sub> AND O<sub>2</sub>- FREE RADICALS, *Photochemistry and Photobiology*, 28, 645-649, 10.1111/j.1751-1097.1978.tb06986.x, 1978.
- Birmili, W., Allen, A. G., Bary, F., and Harrison, R. M.: Trace Metal Concentrations and Water Solubility in Size-Fractionated Atmospheric Particles and Influence of Road Traffic, *Environ. Sci. Technol.*, 40, 1144-1153, 10.1021/es0486925, 2006.
- Bjergbakke, E., Sehested, K., and Rasmussen, O. L.: The Reaction Mechanism and Rate Constants in the Radiolysis of  $\{\text{Fe}^{2+}\}-\{\text{Cu}^{2+}\}$  Solutions, *Radiation Research*, 66, 433-442, 1976.
- Brandt, C., and van Eldik, R.: Transition Metal-Catalyzed Oxidation of Sulfur(IV) Oxides. Atmospheric-Relevant Processes and Mechanisms, *Chem. Rev.*, 95, 119-190, 10.1021/cr00033a006, 1995.
- Bukowiecki, N., Lienemann, P., Hill, M., Figi, R., Richard, A., Furger, M., Rickers, K., Falkenberg, G., Zhao, Y., Cliff, S. S., Prevot, A. S. H., Baltensperger, U., Buchmann, B.,

and Gehrig, R.: Real-World Emission Factors for Antimony and Other Brake Wear Related Trace Elements: Size-Segregated Values for Light and Heavy Duty Vehicles, *Environ. Sci. Technol.*, 43, 8072-8078, 10.1021/es9006096, 2009.

Cantrell, C. A., Mauldin, L., Zondlo, M., Eisele, F., Kosciuch, E., Shetter, R., Lefer, B., Hall, S., Campos, T., Ridley, B., Walega, J., Fried, A., Wert, B., Flocke, F., Weinheimer, A., Hannigan, J., Coffey, M., Atlas, E., Stephens, S., Heikes, B., Snow, J., Blake, D., Blake, N., Katzenstein, A., Lopez, J., Browell, E. V., Dibb, J., Scheuer, E., Seid, G., and Talbot, R.: Steady state free radical budgets and ozone photochemistry during TOPSE, *J. Geophys. Res.-Atmos.*, 108, 8361, 10.1029/2002jd002198, 2003.

Casas, J. M., Alvarez, F., and Cifuentes, L.: Aqueous speciation of sulfuric acid–cupric sulfate solutions, *Chemical Engineering Science*, 55, 6223-6234, 10.1016/s0009-2509(00)00421-8, 2000.

Christensen, H., and Sehested, K.: Pulse radiolysis at high temperatures and high pressures, *Radiation Physics and Chemistry (1977)*, 18, 723-731, 10.1016/0146-5724(81)90195-3, 1981.

Christensen, H., Sehested, K., and Corfitzen, H.: Reactions of hydroxyl radicals with hydrogen peroxide at ambient and elevated temperatures, *The Journal of Physical Chemistry*, 86, 1588-1590, 10.1021/j100206a023, 1982.

Christensen, H., Sehested, K., and Løgager, T.: The reaction of hydrogen peroxide with Fe(II) ions at elevated temperatures, *Radiation Physics and Chemistry*, 41, 575-578, 10.1016/0969-806x(93)90022-m, 1993.

Cooper, P. L., and Abbatt, J. P. D.: Heterogeneous interactions of OH and HO<sub>2</sub> radicals with surfaces characteristic of atmospheric particulate matter, *J. Phys. Chem.*, 100, 2249-2254, 1996.

de Reus, M., Fischer, H., Sander, R., Gros, V., Kormann, R., Salisbury, G., Van Dingenen, R., Williams, J., Zollner, M., and Lelieveld, J.: Observations and model calculations of trace gas scavenging in a dense Saharan dust plume during MINATROC, *Atmos. Chem. Phys.*, 5, 1787-1803, 2005.

Deguillaume, L., Leriche, M., Monod, A., and Chaumerliac, N.: The role of transition metal ions on HO<sub>x</sub> radicals in clouds: a numerical evaluation of its impact on multiphase chemistry, *Atmos. Chem. Phys.*, 4, 95-110, 10.5194/acp-4-95-2004, 2004.

Formenti, P., Elbert, W., Maenhaut, W., Haywood, J., Osborne, S., and Andreae, M. O.: Inorganic and carbonaceous aerosols during the Southern African Regional Science Initiative (SAFARI 2000) experiment: Chemical characteristics, physical properties, and emission data for smoke from African biomass burning, *J. Geophys. Res.*, 108, 8488, 10.1029/2002jd002408, 2003.

Fuchs, H., Bohn, B., Hofzumahaus, A., Holland, F., Lu, K. D., Nehr, S., Rohrer, F., and Wahner, A.: Detection of HO<sub>2</sub> by laser-induced fluorescence: calibration and

interferences from RO<sub>2</sub> radicals, *Atmos. Meas. Tech.*, 4, 1209-1225, 10.5194/amt-4-1209-2011, 2011.

Goforth, M. R., and Christoforou, C. S.: Particle size distribution and atmospheric metals measurements in a rural area in the South Eastern USA, *Sci. Total Environ.*, 356, 217-227, 10.1016/j.scitotenv.2005.03.017, 2006.

Goldstein, S., Czapski, G., Cohen, H., and Meyerstein, D.: Deamination of  $\beta$ -alanine induced by hydroxyl radicals and monovalent copper ions. A pulse radiolysis study, *Inorganica Chimica Acta*, 192, 87-93, 10.1016/s0020-1693(00)83177-1, 1992.

Graedel, T. E., and Weschler, C. J.: Chemistry within aqueous atmospheric aerosols and raindrops, *Rev. Geophys.*, 19, 505-539, 10.1029/RG019i004p00505, 1981.

Guieu, C., Chester, R., Nimmo, M., Martin, J. M., Guerzoni, S., Nicolas, E., Mateu, J., and Keyse, S.: Atmospheric input of dissolved and particulate metals to the northwestern Mediterranean, *Deep Sea Research Part II: Topical Studies in Oceanography*, 44, 655-674, 10.1016/s0967-0645(97)88508-6, 1997.

Halstead, M. J. R., Cunninghame, R. G., and Hunter, K. A.: Wet deposition of trace metals to a remote site in Fiordland, New Zealand, *Atmos. Environ.*, 34, 665-676, 10.1016/s1352-2310(99)00185-5, 2000.

Harrison, R. M., and Yin, J.: Particulate matter in the atmosphere: which particle properties are important for its effects on health?, *Sci. Total Environ.*, 249, 85-101, 10.1016/s0048-9697(99)00513-6, 2000.

Heal, M. R., Hibbs, L. R., Agius, R. M., and Beverland, I. J.: Total and water-soluble trace metal content of urban background PM<sub>10</sub>, PM<sub>2.5</sub> and black smoke in Edinburgh, UK, *Atmos. Environ.*, 39, 1417-1430, 10.1016/j.atmosenv.2004.11.026, 2005.

Hofmann, H., Hoffmann, P., and Lieser, K. H.: Transition metals in atmospheric aqueous samples, analytical determination and speciation, *Fresenius' Journal of Analytical Chemistry*, 340, 591-597, 10.1007/bf00322435, 1991.

Horvath, H., Kasaharat, M., and Pesava, P.: The size distribution and composition of the atmospheric aerosol at a rural and nearby urban location, *J. Aerosol. Sci.*, 27, 417-435, 10.1016/0021-8502(95)00546-3, 1996.

Infante, R., and Acosta, I. L.: Size distribution of trace metals in Ponce, Puerto Rico air particulate matter, *Atmospheric Environment. Part B. Urban Atmosphere*, 25, 121-131, 10.1016/0957-1272(91)90046-h, 1991.

Jacob, D. J.: Chemistry of OH in remote clouds and its role in the production of formic acid and peroxymonosulfate, *J. Geophys. Res.-Atmos.*, 91, 9807-9826, 1986.

Jacob, D. J.: Heterogeneous chemistry and tropospheric ozone, *Atmos. Environ.*, 34, 2131-2159, 2000.

Jacobsen, F., Holcman, J., and Sehested, K.: Activation parameters of ferryl ion reactions in aqueous acid solutions, *Int. J. Chem. Kinet.*, 29, 17-24, 10.1002/(sici)1097-4601(1997)29:1<17::aid-kin3>3.0.co;2-o, 1997.

Jacobsen, F., Holcman, J., and Sehested, K.: Reactions of the ferryl ion with some compounds found in cloud water, *Int. J. Chem. Kinet.*, 30, 215-221, 10.1002/(sici)1097-4601(1998)30:3<215::aid-kin7>3.0.co;2-v, 1998.

Jayson, G. G., Parsons, B. J., and Swallow, A. J.: Oxidation of ferrous ions by perhydroxyl radicals, *Journal of the Chemical Society, Faraday Transactions 1: Physical Chemistry in Condensed Phases*, 69, 1973a.

Jayson, G. G., Parsons, B. J., and Swallow, A. J.: Appearance of sulphatoferric complexes in the oxidation of ferrous sulphate solutions. A study by pulse radiolysis, *Journal of the Chemical Society, Faraday Transactions 1: Physical Chemistry in Condensed Phases*, 69, 1079-1089, 1973b.

Kelley, J. A., Jaffe, D. A., Baklanov, A., and Mahura, A.: Heavy metals on the Kola Peninsula: aerosol size distribution, *Sci. Total Environ.*, 160-161, 135-138, 10.1016/0048-9697(95)04351-z, 1995.

Kim, N. K., Kim, Y. P., and Kang, C. H.: Long-term trend of aerosol composition and direct radiative forcing due to aerosols over Gosan: TSP, PM10, and PM2.5 data between 1992 and 2008, *Atmos. Environ.*, 45, 6107-6115, 10.1016/j.atmosenv.2011.08.051, 2011.

Kosak-Channing, L. F., and Helz, G. R.: Solubility of ozone in aqueous solutions of 0-0.6 M ionic strength at 5-30.degree.C, *Environ. Sci. Technol.*, 17, 145-149, 10.1021/es00109a005, 1983.

Kuo, C.-Y., Wang, J.-Y., Chang, S.-H., and Chen, M.-C.: Study of metal concentrations in the environment near diesel transport routes, *Atmos. Environ.*, 43, 3070-3076, 10.1016/j.atmosenv.2009.03.028, 2009.

Lannefors, H., Hansson, H. C., and Granat, L.: Background aerosol composition in Southern Sweden—Fourteen micro and macro constituents measured in seven particle size intervals at one site during one year, *Atmospheric Environment (1967)*, 17, 87-101, 10.1016/0004-6981(83)90012-4, 1983.

Lee, P. K. H., Brook, J. R., Dabek-Zlotorzynska, E., and Mabury, S. A.: Identification of the Major Sources Contributing to PM2.5 Observed in Toronto, *Environ. Sci. Technol.*, 37, 4831-4840, 10.1021/es026473i, 2003.

Li, S.-M., and Winchester, J. W.: Aerosol silicon and associated elements in the arctic high and mid-troposphere, *Atmospheric Environment. Part A. General Topics*, 27, 2907-2912, 10.1016/0960-1686(93)90322-p, 1993.

Lind, J. A., and Kok, G. L.: Henry's Law Determinations for Aqueous Solutions of Hydrogen Peroxide, Methylhydroperoxide, and Peroxyacetic Acid, *J. Geophys. Res.*, 91, 7889-7895, 10.1029/JD091iD07p07889, 1986.

Loeager, T., Holcman, J., Sehested, K., and Pedersen, T.: Oxidation of ferrous ions by ozone in acidic solutions, *Inorganic Chemistry*, 31, 3523-3529, 10.1021/ic00043a009, 1992.

Maenhaut, W., Salma, I., Cafmeyer, J., Annegarn, H. J., and Andreae, M. O.: Regional atmospheric aerosol composition and sources in the eastern Transvaal, South Africa, and impact of biomass burning, *J. Geophys. Res.*, 101, 23631-23650, 10.1029/95jd02930, 1996.

Manoj, S. V., Mishra, C. D., Sharma, M., Rani, A., Jain, R., Bansal, S. P., and Gupta, K. S.: Iron, manganese and copper concentrations in wet precipitations and kinetics of the oxidation of SO<sub>2</sub> in rain water at two urban sites, Jaipur and Kota, in Western India, *Atmos. Environ.*, 34, 4479-4486, 10.1016/s1352-2310(00)00117-5, 2000.

Mao, J., Jacob, D. J., Evans, M. J., Olson, J. R., Ren, X., Brune, W. H., Clair, J. M. S., Crouse, J. D., Spencer, K. M., Beaver, M. R., Wennberg, P. O., Cubison, M. J., Jimenez, J. L., Fried, A., Weibring, P., Walega, J. G., Hall, S. R., Weinheimer, A. J., Cohen, R. C., Chen, G., Crawford, J. H., McNaughton, C., Clarke, A. D., Jaeglé, L., Fisher, J. A., Yantosca, R. M., Le Sager, P., and Carouge, C.: Chemistry of hydrogen oxide radicals (HO<sub>x</sub>) in the Arctic troposphere in spring, *Atmos. Chem. Phys.*, 10, 5823-5838, 10.5194/acp-10-5823-2010, 2010.

Matthew, B. M., George, I., and Anastasio, C.: Hydroperoxyl radical (HO<sub>2</sub> center dot) oxidizes dibromide radical anion (Br-center dot(2)-) to bromine (Br-2) in aqueous solution: Implications for the formation of Br-2 in the marine boundary layer, *Geophys. Res. Lett.*, 30, 10.1029/2003gl018572, 2003.

Mesmer, R. E.: Hydrolysis of iron(2+) in dilute chloride at 25.deg, *Inorganic Chemistry*, 10, 857-858, 10.1021/ic50098a038, 1971.

Miller, C. E., and Francisco, J. S.: The formation of a surprisingly stable HO<sub>2</sub>-H<sub>2</sub>SO<sub>4</sub> complex, *J. Am. Chem. Soc.*, 123, 10387-10388, 2001.

Millero, F. J., and Woosley, R.: The Hydrolysis of Al(III) in NaCl solutions-A Model for Fe(III), *Environ. Sci. Technol.*, 43, 1818-1823, 10.1021/es802504u, 2009.

Moffett, J. W., and Zika, R. G.: Reaction kinetics of hydrogen peroxide with copper and iron in seawater, *Environ. Sci. Technol.*, 21, 804-810, 10.1021/es00162a012, 1987.

Mugica, V., Ortiz, E., Molina, L., De Vizcaya-Ruiz, A., Nebot, A., Quintana, R., Aguilar, J., and Alcántara, E.: PM composition and source reconciliation in Mexico City, *Atmos. Environ.*, 43, 5068-5074, 10.1016/j.atmosenv.2009.06.051, 2009.



Piechowski, M. V., Nauser, T., Hoignè, J., and Bühler, R. E.: O<sub>2</sub> Decay Catalyzed by Cu<sup>2+</sup> and Cu<sup>+</sup> Ions in Aqueous Solutions: A Pulse Radiolysis Study for Atmospheric Chemistry, *Berichte der Bunsengesellschaft für physikalische Chemie*, 97, 762-771, 10.1002/bbpc.19930970604, 1993.

Rabani, J., Klug-Roth, D., and Lilie, J.: Pulse radiolytic investigations of the catalyzed disproportionation of peroxy radicals. Aqueous cupric ions, *The Journal of Physical Chemistry*, 77, 1169-1175, 10.1021/j100628a018, 1973.

Robinson, R. A., and Stokes, R. H.: *Electrolyte solutions*, Dover Pubns, 2002.

Ross, H. B., and Noone, K. J.: A numerical investigation of the destruction of peroxy radical by Cu ion catalysed reactions on atmospheric particles, *J. Atmos. Chem.*, 12, 121-136, 10.1007/bf00115775, 1991.

Rush, J. D., and Bielski, B. H. J.: Pulse radiolytic studies of the reaction of perhydroxyl/superoxide O<sub>2</sub><sup>-</sup> with iron(II)/iron(III) ions. The reactivity of HO<sub>2</sub>/O<sub>2</sub><sup>-</sup> with ferric ions and its implication on the occurrence of the Haber-Weiss reaction, *The Journal of Physical Chemistry*, 89, 5062-5066, 10.1021/j100269a035, 1985.

Samara, C., and Voutsas, D.: Size distribution of airborne particulate matter and associated heavy metals in the roadside environment, *Chemosphere*, 59, 1197-1206, 10.1016/j.chemosphere.2004.11.061, 2005.

Schwartz, S. E.: GAS-PHASE AND AQUEOUS-PHASE CHEMISTRY OF HO<sub>2</sub> IN LIQUID WATER CLOUDS, *J. Geophys. Res.-Atmos.*, 89, 1589-1598, 1984.

Sedlak, D. L., and Hoigné, J.: The role of copper and oxalate in the redox cycling of iron in atmospheric waters, *Atmospheric Environment. Part A. General Topics*, 27, 2173-2185, 10.1016/0960-1686(93)90047-3, 1993.

Sedlak, D. L., Hoigné, J., David, M. M., Colville, R. N., Seyffer, E., Acker, K., Wiepercht, W., Lind, J. A., and Fuzzi, S.: The cloudwater chemistry of iron and copper at Great Dun Fell, U.K, *Atmos. Environ.*, 31, 2515-2526, 10.1016/s1352-2310(96)00080-5, 1997.

Sehested, K., Rasmussen, O. L., and Fricke, H.: Rate constants of OH with HO<sub>2</sub>, O<sub>2</sub><sup>-</sup>, and H<sub>2</sub>O<sub>2</sub> from hydrogen peroxide formation in pulse-irradiated oxygenated water, *The Journal of Physical Chemistry*, 72, 626-631, 10.1021/j100848a040, 1968.

Sehested, K., Holcman, J., and Hart, E. J.: Rate constants and products of the reactions of e<sup>-</sup>aq, dioxide(1-) (O<sub>2</sub><sup>-</sup>) and proton with ozone in aqueous solutions, *The Journal of Physical Chemistry*, 87, 1951-1954, 10.1021/j100234a024, 1983.

Siefert, R. L., Johansen, A. M., Hoffmann, M. R., and Pehkonen, S. O.: Measurements of trace metal (Fe, Cu, Mn, Cr) oxidation states in fog and stratus clouds, *J. Air Waste Manage. Assoc.*, 48, 128-143, 1998.

Singh, M., Jaques, P. A., and Sioutas, C.: Size distribution and diurnal characteristics of particle-bound metals in source and receptor sites of the Los Angeles Basin, *Atmos. Environ.*, 36, 1675-1689, 10.1016/s1352-2310(02)00166-8, 2002.

Sun, Y., Zhuang, G., Wang, Y., Han, L., Guo, J., Dan, M., Zhang, W., Wang, Z., and Hao, Z.: The air-borne particulate pollution in Beijing—concentration, composition, distribution and sources, *Atmos. Environ.*, 38, 5991-6004, 10.1016/j.atmosenv.2004.07.009, 2004.

Sun, Y., Zhuang, G., Tang, A., Wang, Y., and An, Z.: Chemical Characteristics of PM<sub>2.5</sub> and PM<sub>10</sub> in Haze-Fog Episodes in Beijing, *Environ. Sci. Technol.*, 40, 3148-3155, 10.1021/es051533g, 2006.

Thornton, A. T., and Laurence, G. S.: Kinetics of oxidation of transition-metal ions by halogen radical anions. Part I. The oxidation of iron(II) by dibromide and dichloride ions generated by flash photolysis, *Journal of the Chemical Society, Dalton Transactions*, 1973.

Walling, C., and Goosen, A.: Mechanism of the ferric ion catalyzed decomposition of hydrogen peroxide. Effect of organic substrates, *J. Am. Chem. Soc.*, 95, 2987-2991, 10.1021/ja00790a042, 1973.

Wang, Y. H., Ridley, B., Fried, A., Cantrell, C., Davis, D., Chen, G., Snow, J., Heikes, B., Talbot, R., Dibb, J., Flocke, F., Weinheimer, A., Blake, N., Blake, D., Shetter, R., Lefer, B., Atlas, E., Coffey, M., Walega, J., and Wert, B.: Springtime photochemistry at northern mid and high latitudes, *J. Geophys. Res.-Atmos.*, 108, 8358, doi:10.1029/2002jd002227, 2003.

Wilkinson, J., Reynolds, B., Neal, C., Hill, S., Neal, M., and Harrow, M.: Major, minor and trace element composition of cloudwater and rainwater at Plynlimon, *Hydrol. Earth Syst. Sci.*, 1, 557-569, 10.5194/hess-1-557-1997, 1997.

Ziajka, J., Beer, F., and Warneck, P.: Iron-catalysed oxidation of bisulphite aqueous solution: Evidence for a free radical chain mechanism, *Atmos. Environ.*, 28, 2549-2552, 10.1016/1352-2310(94)90405-7, 1994.
